# Supplementary material for: Diagnosing cardiovascular disease in western lowland gorillas (Gorilla gorilla gorilla) with brain natriuretic peptide
Source: PLoS One. 2019 Mar 19;14(3):e0214101. doi: 10.1371/journal.pone.0214101 (PMC6424555; doi:10.1371/journal.pone.0214101)
Supplement: S1 Table — (XLSX) [file pone.0214101.s006.xlsx]

## Sheet: final 8_26_2018_gorilla  file f
WEIGHT (kg)	SEX	AGE	DATE OF SAMPLE ANALYSIS	RESULTS (pg/mL)	DATE OF DEATH	IVSD	LVIDD	LVPWD	EF
NP	F	31	2010-04-29	41.6	2011-10-13
NP	M	24	2009-08-27	9.2	2016-11-06	1.6	4.8	1.7	55
167.4	M	31	2012-02-02	67.6
102.5	F	12	2009-09-10	7.7		0.78	5.2	0.95	65
NP	F	14	2011-09-10	7.7
NP	F	14	2011-10-13	19
NP	F	17	2015-04-30	4		1.04	4.52		71
130.7	M	10	2012-08-01	51.7		1.72	5.49	1.37	55
NP	F	14	2009-07-31	4
83.3	F	16	2013-12-05	4		1.14	4.06	0.94	65
177	M	19	2011-02-08	19.9		1.21	5.8	1.36
99	F	26	2008-08-20	9.4		0.7	4.4	0.9	70
NP	M	19	2010-06-10	17.4
NP	M	20	2010-10-20	7.7
96	F	20	2008-05-22	46.1		1.1	4.7	1.1	52
NP	F	20	2011-03-10	26.5		0.95	4.47	0.97	62
184	M	30	2008-05-06	39.3		1.22	6.12	1.22	65
NP	F	20	2009-12-17	8.3
183	M	31	2013-12-04	12.5		1.49	4.58	2.03	65
NP	M	12	2010-02-24	14.9		1.39	5.67	1.22	64
NP	M	24	2008-02-14	45.7
147	M	14	2010-06-14	20.1		1.2	5	1.2	69
170	M	16	2012-01-09	22.3		1.31	6.31	1.31	81
NP	F	49	2010-03-16	4
NP	F	46	2008-08-26	36.4		1.18	3.9	1.51	73
210.4	M	28	2010-04-27	156
NP	M	23	2009-02-24	179		1.9	3.15	2	80
NP	M	44	2008-08-13	50.8	2008-08-13	1.7	5.7	1.6
120	M	43	2007-11-15	45.6	2008-08-13	2.1	4.4	2	33
NP	M	18	2011-08-25	115	2011-09-25	1.7	7.4	1.5	20
101	F	36	2008-11-05	45.1
NP	M	31	2011-05-24	40.1		1.4	5.2	1.4	55
NP	M	18	2009-08-27	30.8
NP	F	44	2011-03-16	5000	2011-03-16
95	F	14	2009-09-30	8.2		0.85	4.35	0.9	55
NP	M	14	2012-01-31	10.7		1.23	5.4	1.17	51
NP	M	34	2013-05-09	60
193.2	M	30	2009-04-16	24.1		1.63	6.96	1.63	72
200	M	21	2008-05-20	5000	2008-11-01	2.3	7.56	1.8	9
NP	F	34	2011-08-17	40.8		1.32	4.38	1.23	71
NP	M	45	2008-01-14	737	2012-07-30	2.39	6.02	2.54	40
NP	M	49	2012-07-31	5000	2012-07-30
162	M	10	2012-08-01	14.5		1.78	5.87	1.51	56
NP	M	33	2009-02-11	1170	2009-02-25	2			45
NP	F	15	2008-02-20	4
NP	M	17	2008-09-23	19
NP	M	22	2013-11-14	13.9
160	M	22	2011-05-19	6		1	5.3	1.5	73
174.6	M	14	2011-02-03	41.7
72.5	F	14	2008-07-03	11.9
NP	M	16	2011-12-28	47.7
NP	F	26	2008-05-22	130
NP	F	29	2010-12-08	50
NP	M	14	2008-04-24	5	2011-06-28
NP	F	14	2013-03-21	7.9
NP	F	10	2009-03-30	65.9
164	M	26	2012-05-24	6.5		1.11	4.29	1.18
162	M	22	2008-03-27	4		1.2	5.5	1.2	65
NP	M	18	2009-08-27	16.3
88.2	M	11	2012-01-31	27.7		0.86	4.49	1.04	55
93	F	22	2010-03-15	61.2
NP	F	14	2009-07-31	8.7
106	F	16	2011-03-15	37.6
NP	M	17	2014-03-19	47
NP	F	26	2010-03-02	11.2
NP	M	22	2006-03-30	1400	2006-06-30	1.3	7.28	1.9	30
NP	M	23	2006-06-19	4500	2006-06-30	1.3	10.8	1.5	19
118.5	M	13	2012-03-13	7.4		0.95	4.18	0.94	61
125	M	25	2007-12-12	12.7		2.05	4.71
NP	M	28	2010-04-13	21.9
NP	M	15	2008-05-08	20		1.5	5.5	1	65
NP	F	33	2009-02-11	4
NP	F	30	2011-12-19	6.3		0.97	4.91	1.05	79
NP	F	33	2014-05-07	14.6		1.32	3.85	1.02	57
NP	M	19	2014-03-04	54.4
NP	F	39	2010-02-18	2000	2010-02-15	1.3	3.5	1.2	40
NP	M	12	2014-05-12	62.3		1.59	4.82	1.65	61
NP	F	29	2011-03-08	16.2
82	F	18	2007-11-28	4		1.1	4.29	0.9	66
NP	F	22	2011-03-16	4		0.76	3.62	0.75	66
NP	M	17	2008-05-27	4
NP	M	29	2014-02-04	127
NP	M	10	2011-03-03	42.1
NP	F	17	2013-08-22	13.8
NP	F	13	2009-12-17	44.1
NP	F	11	2011-07-27	20.5
102.7	F	15	2009-09-16	6		0.7	4.4	0.8	70
NP	F	18	2012-09-13	7.1		1.29	3.92	0.96	65
80.5	F	14	2010-02-04	4		0.8	4	0.9	65
NP	F	44	2010-07-21	259	2010-07-19
88	F	10	2008-08-27	4		0.7	3.8	0.7
NP	M	15	2008-11-24	40.7
NP	M	29	2010-08-18	30.5		1.3	5.1	1.3	77
93	F	18	2007-12-17	8.9		1.8	4.1	0.8	66
93.9	F	22	2011-02-22	12.2		0.93	3.86	0.97	65
NP	M	23	2013-09-04	16.6		2.69	4.39	2.41	75
NP	M	25	2014-02-25	4		1.25	5.75	1.48	73
NP	M	25	2009-09-29	10.3		1.3	6.4	1.6	60
183.5	M	40	2008-05-22	41.7		2.7	4.5	2.6	43
NP	F	35	2010-01-05	46.8		1.3	5.3	1.3	50
NP	F	38	2012-12-20	4
NP	M	17	2012-01-12	55.1		1.7	6.3	1.9	46
NP	M	11	2013-09-09	28.8		1.65	3.43	2.06	67
90.9	F	14	2011-12-19	9.8		1.4	3.94	1.12	52
NP	F	17	2014-05-07	23.9		1.22	2.9	2	82
NP	F	14	2011-10-12	17.1			3.5		55
NP	M	19	2010-06-14	8.5
NP	F	11	2009-05-26	47.7
268	M	33	2007-12-06	240	2008-03-10	2.5	6	2.6	72
NP	F	14	2010-01-05	27
149	M	36	2009-07-29	4	2015-05-26
NP	F	48	2007-12-12	33.5	2011-08-01	1.6	5.9	1.88	60
NP	F	17	2008-02-26	56.8
NP	M	11	2013-09-09	47		1.58	5.49	1.58	63
NP	M	17	2008-02-26	71.2
NP	M	19	2010-04-15	71
